# Supplementary material
Source: PubMed Central journal article supplement (PMC3991696)

Supplementary Document 1. Procedures for accounting for allele frequencies of unsampled individuals in calculating effect sizes for extreme samples.

Example: Hettema et al. (2008) sampled individuals from the top 20<sup>th</sup> and bottom 20<sup>th</sup> percentile of latent genetic risk for neuroticism. Data obtained from the first author included frequencies by COMT Val158Met genotype and neuroticism status. For instance, data from female participants in the Stage 1 sample (sample “A” in Table 1 of the manuscript) are:

|                                                | Met/Met | Val/Met | Val/Val |
|------------------------------------------------|---------|---------|---------|
| Top 20 <sup>th</sup> percentile neuroticism    | 21      | 43      | 23      |
| Bottom 20 <sup>th</sup> percentile neuroticism | 29      | 47      | 10      |

Total  $N = 173$

Based on the total  $N$  of 173 for 40% of the original sample (top 20<sup>th</sup> + bottom 20<sup>th</sup> percentile), we calculated the original sample size of 432.5 ( $= 173 / 0.4$ ). According to Palmetier et al. (1999), the genotype frequencies for Met/Met, Val/Met and Val/Val in Mixed European populations are 0.297, 0.527 and 0.176, respectively. Based on these genotype frequencies, we calculated the expected number of women by COMT Val158Met genotype in the Hettema et al. (2008) sample. For instance, the expected number of women with the Met/Met genotype was calculated as  $(432.5 \times 0.297) = 128.5$ ; see row 2 of the table below for other genotype  $n$ 's. In the next step, we calculated the expected number of individuals falling in the middle 60% (100% - top 20<sup>th</sup> percentile – bottom 20<sup>th</sup> %percentile) by subtracting the actual genotype  $n$  from the expected genotype  $n$ . For example, for Met/Met,  $n$  for the middle 60% individuals was calculated as  $(128.5 - 21 - 29 = 78.5)$ ; see row 3 for other genotypes. We also calculated the expected genotype  $n$  for the bottom 80<sup>th</sup> percentile of the neuroticism by adding the expected  $n$  for the middle 60% of the neuroticism distribution and the actual  $n$  for the bottom 20<sup>th</sup>% percentile (e.g.,  $29+78.5 = 107.5$  for Met/Met); see row 4 below.

|                                                     | Met/Met | Val/Met | Val/Val |
|-----------------------------------------------------|---------|---------|---------|
| Palmetier et al. (1999) genotype frequency          | 0.297   | 0.527   | 0.176   |
| Expected genotype $n$ in full sample of 433         | 128.45  | 227.93  | 76.12   |
| Expected genotype $n$ in middle 60% of distribution | 78.45   | 137.93  | 43.12   |
| Expected genotype $n$ in bottom 80% of distribution | 107.45  | 184.93  | 53.12   |

From the two tables, we rounded off the frequencies into integers and formed a table of frequencies by COMT Val158Met genotype and neuroticism status (top 20% vs. bottom 80%):

|                                                | Met/Met | Val/Met | Val/Val |
|------------------------------------------------|---------|---------|---------|
| Top 20 <sup>th</sup> percentile neuroticism    | 21      | 43      | 23      |
| Bottom 80 <sup>th</sup> percentile neuroticism | 107     | 185     | 53      |

To obtain the odds of high neuroticism (top 20%) given Met/Met genotype, relative to the odds of high neuroticism given Val/Val genotype, we first calculated the following table of cell probabilities:

|                                                | Met/Met                      | Val/Val                     |
|------------------------------------------------|------------------------------|-----------------------------|
| Top 20 <sup>th</sup> percentile neuroticism    | 21<br>( $p_{MM20}=0.4773$ )  | 23<br>( $p_{VV20}=0.5227$ ) |
| Bottom 80 <sup>th</sup> percentile neuroticism | 107<br>( $p_{MM80}=0.6688$ ) | 53<br>( $p_{VV80}=0.3313$ ) |

$$ES_{OR} = \frac{P_{MM20} * P_{VV80}}{P_{MM80} * P_{VV20}} = 0.4523$$

The log odds ratio was calculated as:

$$\begin{aligned} ES_{LOR} &= \ln(ES_{OR}) \\ &= \ln(0.4523) \\ &= -0.7934 \end{aligned}$$

To transform  $ES_{LOR}$  into an effect size comparable with effect sizes in mean differences metric, the Cox method was applied:

$$\begin{aligned} ES_{Cox} &= ES_{LOR} / 1.65 \\ &= (-0.7934) / 1.65 \\ &= -0.4809 \end{aligned}$$

The sampling variance of the  $ES_{Cox}$  was calculated as follows:

$$\begin{aligned} SE_{Cox} &= 0.367 \left[ \frac{1}{O_{MM20}} + \frac{1}{O_{MM80}} + \frac{1}{O_{VV20}} + \frac{1}{O_{VV80}} \right] \\ &= 0.367 \left[ \frac{1}{21} + \frac{1}{107} + \frac{1}{23} + \frac{1}{53} \right] \\ &= 0.0438 \end{aligned}$$

Supplementary Table 1. Effect size (standard error) of the association between COMT Val158Met polymorphism and any anxiety-related traits by genotypic contrast and sex for each study.

| Study        | Year       | Sex | Measure (construct) | Ethnicity | Met/Met vs. Val/Val | Met/Met vs. Val/* | Met/* vs. Val/Val |
|--------------|------------|-----|---------------------|-----------|---------------------|-------------------|-------------------|
| Benjamin     | 2000       | MF  | TPQ (HA)            | Unknown   | -.041 (.138)        | -.022 (.118)      | -.034 (.100)      |
| Henderson    | 2000       | MF  | Combined            | Caucasian | -.012 (.096)        | .009 (.077)       | -.024 (.079)      |
|              |            | M   |                     |           | -.172 (.142)        | -.125 (.112)      | -.092 (.118)      |
|              |            | F   |                     |           | .123 (.130)         | .113 (.106)       | .053 (.107)       |
| Eley         | 2003       | F   | NEO-FFI (N)         | Caucasian | .128 (.282)         | .318 (.208)       | -.103 (.255)      |
| Kim (A)      | 2004       | MF  | TCI (HA)            | Caucasian | -.187 (.161)        | -.246 (.128)      | .013 (.130)       |
|              |            | M   |                     |           | -.253 (.229)        | -.231 (.186)      | -.095 (.183)      |
|              |            | F   |                     |           | -.160 (.227)        | -.252 (.176)      | .054 (.186)       |
| Kim (B)      | 2004       | F   | TCI (HA)            | Asian     | .054 (.461)         | .232 (.429)       | -.223 (.264)      |
| Tsai         | 2004       | F   | TPQ (HA)            | Asian     | -.075 (.425)        | -.011 (.419)      | -.009 (.186)      |
| Harris       | 2005       | MF  | HADS (Anx)          | Caucasian | .077 (.127)         | -.017 (.099)      | .108 (.106)       |
|              |            | M   |                     |           | .133 (.194)         | .074 (.151)       | .109 (.163)       |
|              |            | F   |                     |           | .042 (.168)         | -.064 (.131)      | .110 (.139)       |
| Olsson       | 2005, 2007 | MF  | Combined            | Caucasian | -.163 (.111)        | -.115 (.089)      | -.103 (.093)      |
|              |            | M   |                     |           | -.147 (.173)        | -.068 (.140)      | -.139 (.147)      |
|              |            | F   |                     |           | -.161 (.147)        | -.128 (.117)      | -.085 (.122)      |
| Reuter       | 2005       | MF  | Combined            | Caucasian | .192 (.147)         | .144 (.120)       | .110 (.121)       |
|              |            | M   |                     |           | .042 (.281)         | -.028 (.222)      | .084 (.237)       |
|              |            | F   |                     |           | .281 (.173)         | .226 (.142)       | .138 (.141)       |
| Hoth         | 2006       | MF  | Combined            | Caucasian | .041 (.144)         | -.026 (.111)      | .075 (.124)       |
|              |            | M   |                     |           | .103 (.190)         | .008 (.148)       | .131 (.164)       |
|              |            | F   |                     |           | -.036 (.222)        | -.054 (.168)      | -.006 (.189)      |
| Ivanova      | 2006       | MF  | TCI (HA)            | Caucasian | -.060 (.259)        | -.013 (.227)      | -.076 (.209)      |
|              |            | M   |                     |           | -.275 (.405)        | -.221 (.355)      | -.187 (.332)      |
|              |            | F   |                     |           | .133 (.338)         | .171 (.297)       | .004 (.268)       |
| Kim          | 2006       | MF  | TCI (HA)            | Asian     | -.648 (.209)        | -.481 (.200)      | -.358 (.119)      |
|              |            | M   |                     |           | -.436 (.278)        | -.336 (.267)      | -.179 (.171)      |
|              |            | F   |                     |           | -.840 (.317)        | -.625 (.303)      | -.535 (.167)      |
| Reuter       | 2006       | MF  | BIS (BI)            | Caucasian | .136 (.157)         | .095 (.132)       | .100 (.130)       |
|              |            | M   |                     |           | .525 (.232)         | .391 (.191)       | .364 (.189)       |
|              |            | F   |                     |           | -.185 (.218)        | -.161 (.183)      | -.106 (.179)      |
| Tochigi      | 2006       | MF  | NEO-PI-R (N)        | Asian     | -.073 (.211)        | .011 (.201)       | -.153 (.128)      |
| Golimbet     | 2007       | MF  | Combined            | Caucasian | .212 (.181)         | .070 (.152)       | .224 (.143)       |
|              |            | M   |                     |           | -.061 (.310)        | -.092 (.246)      | -.007 (.258)      |
|              |            | F   |                     |           | .403 (.227)         | .209 (.193)       | .367 (.174)       |
| Hashimoto    | 2007       | MF  | TCI (HA)            | Asian     | .611 (.272)         | .468 (.260)       | .467 (.173)       |
|              |            | M   |                     |           | .658 (.491)         | .523 (.476)       | .570 (.306)       |
|              |            | F   |                     |           | .561 (.327)         | .425 (.311)       | .391 (.211)       |
| Ishii        | 2007       | MF  | TCI (HA)            | Asian     | .051 (.174)         | .083 (.169)       | -.059 (.092)      |
|              |            | M   |                     |           | -.316 (.228)        | -.245 (.219)      | -.160 (.128)      |
|              |            | F   |                     |           | .714 (.276)         | .671 (.269)       | .098 (.132)       |
| Urata        | 2007       | F   | NEO-FFI (N)         | Asian     | .152 (.283)         | .116 (.272)       | .093 (.158)       |
| Bækken       | 2008       | MF  | HADS (Anx)          | Caucasian | .024 (.066)         | .013 (.048)       | .019 (.059)       |
|              |            | M   |                     |           | -.103 (.107)        | -.060 (.079)      | -.076 (.094)      |
|              |            | F   |                     |           | .124 (.085)         | .073 (.062)       | .091 (.076)       |
| Hetteema (A) | 2008       | MF  | EPQ-R-S (N)         | Caucasian | -.296 (.148)        | -.139 (.115)      | -.243 (.125)      |
|              |            | M   |                     |           | -.101 (.213)        | -.069 (.158)      | -.064 (.183)      |
|              |            | F   |                     |           | -.481 (.209)        | -.210 (.167)      | -.414 (.173)      |

Supplementary Table 1 (continued)

| Study        | Year | Sex | Measure (construct) | Ethnicity | Met/Met vs. Val/Val | Met/Met vs. Val/* | Met/* vs. Val/Val |
|--------------|------|-----|---------------------|-----------|---------------------|-------------------|-------------------|
| Hettema (B)  | 2008 | MF  | EPQ (N)             | Caucasian | -.378 (.101)        | -.128 (.079)      | -.357 (.085)      |
|              |      | M   |                     |           | -.265 (.127)        | -.085 (.098)      | -.254 (.108)      |
|              |      | F   |                     |           | -.576 (.168)        | -.206 (.134)      | -.540 (.139)      |
| Montag       | 2008 | F   | BIS (BI)            | Caucasian | .564 (.255)         | .535 (.220)       | .303 (.218)       |
| Wray         | 2008 | MF  | EPQ-R-S (N)         | Caucasian | -.172 (.082)        | .050 (.064)       | -.260 (.071)      |
|              |      | M   |                     |           | -.035 (.129)        | .109 (.098)       | -.136 (.114)      |
|              |      | F   |                     |           | -.265 (.107)        | .008 (.086)       | -.344 (.091)      |
| Arias        | 2010 | MF  | STAI-T (Anx)        | Caucasian | -.153 (.131)        | -.205 (.113)      | .008 (.102)       |
|              |      | M   |                     |           | -.188 (.195)        | -.203 (.168)      | -.037 (.153)      |
|              |      | F   |                     |           | -.128 (.176)        | -.194 (.151)      | .028 (.137)       |
| Hatzimanolis | 2010 | F   | EPQ (N)             | Caucasian | .049 (.147)         | .101 (.126)       | -.043 (.113)      |
| Middeldorp   | 2010 | MF  | YASR (Anx)          | Caucasian | .138 (.175)         | .182 (.154)       | -.010 (.130)      |
|              |      | M   |                     |           | -.182 (.261)        | -.075 (.239)      | -.222 (.184)      |
|              |      | F   |                     |           | .357 (.244)         | .341 (.203)       | .076 (.188)       |
| Calati       | 2011 | MF  | TCI (HA)            | Caucasian | .011 (.167)         | -.162 (.140)      | .187 (.132)       |
|              |      | M   |                     |           | .336 (.255)         | -.063 (.202)      | .442 (.214)       |
|              |      | F   |                     |           | -.093 (.227)        | -.180 (.197)      | .061 (.169)       |
| Chen         | 2011 | MF  | Combined            | Asia      | -.056 (.176)        | -.062 (.172)      | .005 (.085)       |
|              |      | M   |                     |           | -.628 (.282)        | -.583 (.276)      | -.205 (.129)      |
|              |      | F   |                     |           | .320 (.228)         | .257 (.222)       | .159 (.115)       |
| Desmeules    | 2011 | F   | STAI-T (Anx)        | Caucasian | .239 (.327)         | .457 (.285)       | -.119 (.251)      |

*Notes:*

1. When a study included multiple anxiety measures, the average effect size across measures was used for analysis.

Supplementary Figure 1. Forest plot of meta-analysis results for (a) combined sex samples; (b) male samples; (c) female samples on all anxiety-related measures; Met/Met vs. Val/Val contrast.

(a) Combined sex samples:

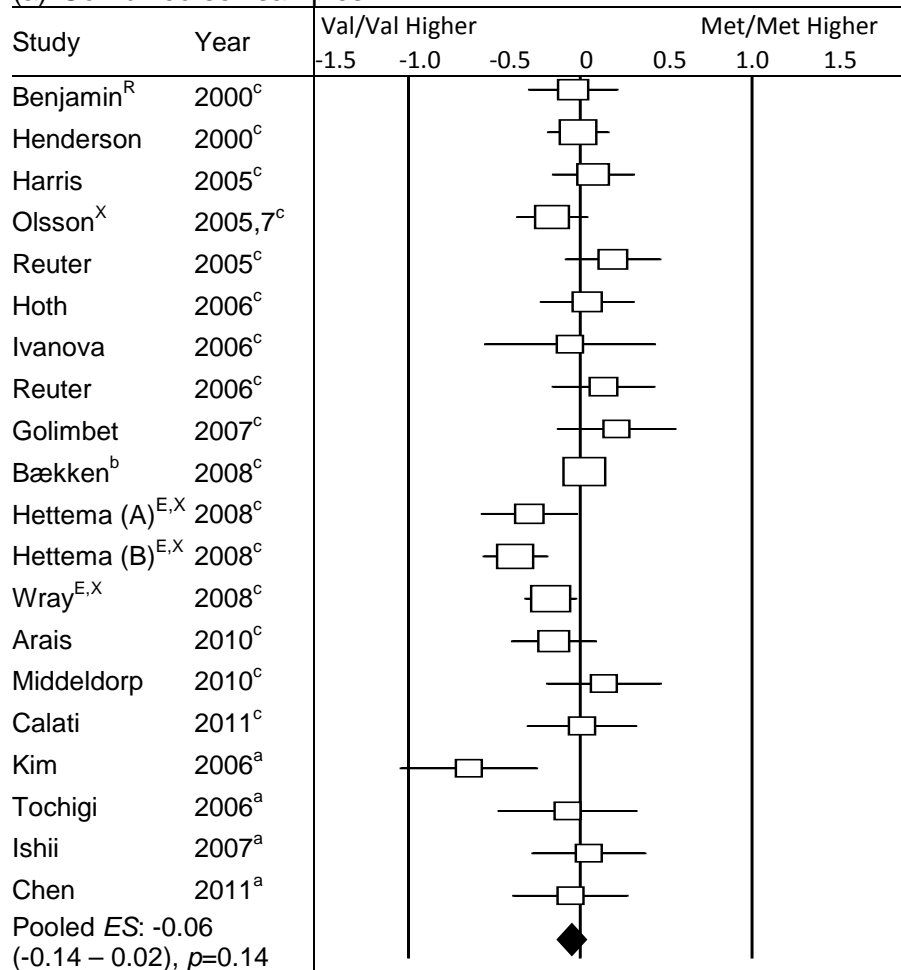

Notes for Supplementary Figure 1a-c:

1. Study subsequently removed in sensitivity analysis due to the following characteristics denoted by superscripts: <sup>E</sup> = extreme sampling, <sup>X</sup> = Cox method used to convert logged odds ratio effect sizes, and <sup>R</sup> = samples with related individuals.
2. Sample ethnicity is denoted by superscripts: <sup>c</sup> = Caucasian, <sup>a</sup> = Asian, <sup>u</sup> = unknown.
3. For Olsson et al. (2005, 2007), data on CIS-R (but not NEO) was removed from the set of sensitivity analysis that accounted for use of logged odds ratio effect sizes.

(b) Male samples:

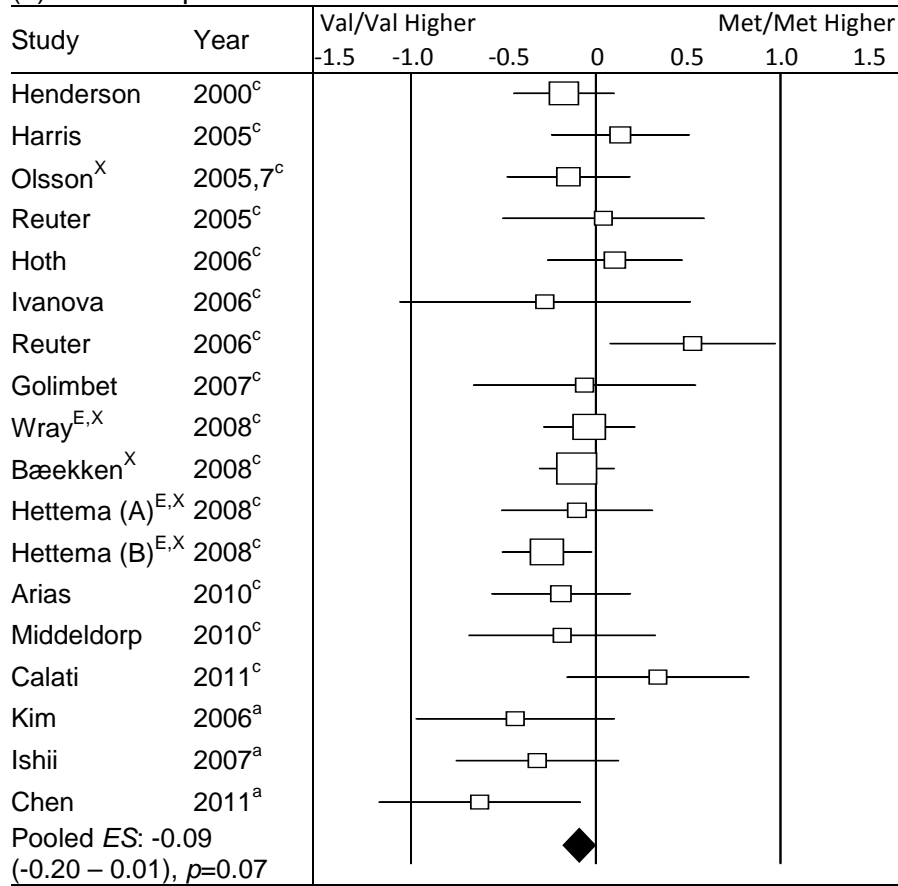

(c) Female samples:

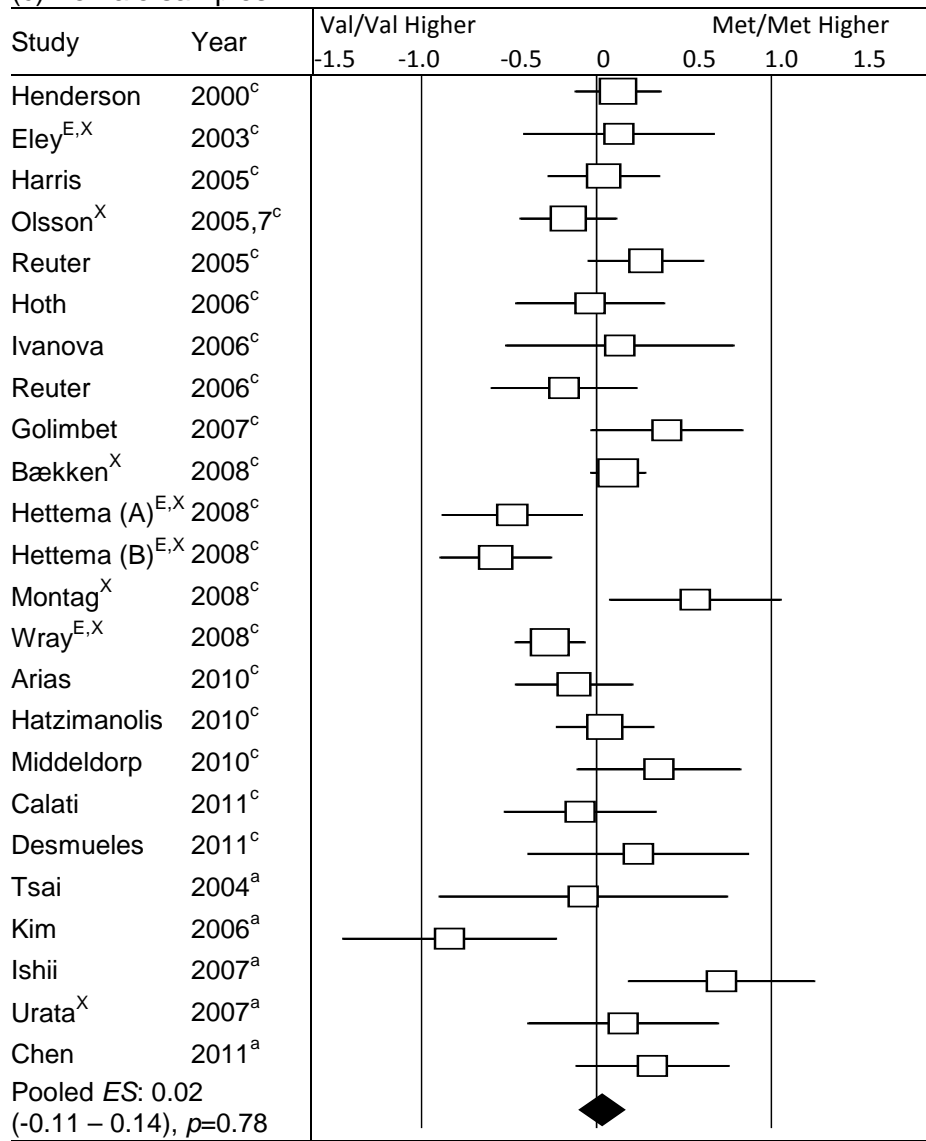

Supplement: NIHMS542722-supplement-1.pdf [file NIHMS542722-supplement-1.pdf]
